# Supplementary material for: Healthcare resource utilization and G‑CSF use in patients with solid tumors or hematological malignancies hospitalized for febrile neutropenia in Bulgaria, Czech Republic and Slovakia
Source: Springer Nature journal article supplement (doi:10.1007/s12254-016-0279-z), 2016-09-01
Supplement: MOESM1 [file 14930822]

**Supplementary Material**

**Healthcare resource utilization and granulocyte-colony stimulating factor use in patients with solid tumors or hematological malignancies hospitalized for febrile neutropenia in Bulgaria, Czech Republic and Slovakia**

**Authors**

**Georgi Mihaylov1, Zhasmina Mihaylova2, Lubos Drgona3, Andrea Cipkova4, Jan Novak5, Roumyana Petrova6**

**Affiliations**

1Specialized Hospital for Active Treatment of Hematology Diseases EAD, Clinic of Clinical Hematology, Sofia, Bulgaria; 2Military Medical Academy Multiprofile Hospital for Active Treatment Sofia, Department of Medical Oncology, Sofia, Bulgaria; 3 Department of Oncohematology, National Cancer Institute and Comenius University, Bratislava, Slovakia; 4Eastern-Slovakian Cancer Institute, Kosice, Slovakia; 5Hematology Department, Faculty Hospital Kralovske Vinohrady, Prague, Czech Republic; 6Amgen Bulgaria EOOD, Sofia, Bulgaria

**Resource use variables (as specified in the protocol)**

**Treatments associated with FN (both inpatient and outpatient):**

**Infection prophylaxis, including anti-infective treatments**

- Number of doses and average dose (within a chemo cycle), reason and delivery route
- Administered by whom and where
  - Antibiotics
  - Antivirals
  - Antimycotics/Antifungals
  - Antiemetics
  - LMWH
  - Others (specify)

**G-CSF**

- By type (INN, administration route), number of doses and average dose (within a chemo cycle), Administered by whom and where: hospital, home via district nurse, other
- Setting: 1ry, 2nd prophylaxis or treatment

**Concomitant medication:** other therapeutic interventions or medicines related to the prophylaxis of FN, type, number of doses and average dose (within a chemo cycle) administered (excludes anti-infectives)

**Interventions associated with FN or infection/sepsis**

- IV fluids
- Insertion of central venous access line
- Invasive interventions supporting vital functions (e.g. dialysis, artificial ventilation)
- RBC blood transfusions due to FN (number and dates of the transfusion), if possible
- Other (specify)

**Investigations associated with FN.** Monitoring, diagnostic procedures and complementary/additional tests type. Data to be collected: Date of investigation, number of tests, where, when and who (nurse or physician) performs them.

- Blood test, full blood count
- Blood urea nitrogen, creatinine and creatinine clearance and electrolytes if carried out
- Blood culture and sensitivity
- Liver function tests, ASAT, ALAT and GGT
- C reactive protein if performed
- Procalcitonin, if performed
- Chest X-ray (2 projections/1 projection)
- Mid stream urine and sensitivity
- Stool culture
- Clostridium difficile Toxin A/B
- Sputum culture and sensitivity (urine culture)
- Drug levels (e.g. Aminoglycoside, Vankomycin)
- Anaerobe cultivation
- Serum protein electrophoresis
- Other supplementary test e.g. arterial blood gases, central line culture and sensitivity, swabs, blood clotting, CT scans, MRI scans and echocardiograms

**Hospital stays associated with FN**

- Visit type (inpatient, outpatient, home care, other)
- Date/time and unit of admission
- Date the FN was diagnosed
- Ward type
- Date and unit of any transfer e.g. High dependency unit, intensive care etc
- Date/time of discharge or death (reason of death)
- Total length of stay
- Number of FN related hospital days and re-hospitalization (if FN events in subsequent cycles)
- Follow up visits e.g. Oncology centre of reference visits, other hospital care, local GP and/or other health care provider visits (if available)

**Results of the sensitivity analyses**

*Hospital stays associated with FN*

A sensitivity analysis was conducted for the following subgroups: visit type (inpatient/outpatient) and number of chemotherapy cycles received (1-2, 3-4, >4). Patients with >4 administered chemotherapy cycles trended to have shorter FN-related hospital stays than patients with 1-2 administered chemotherapy cycles. The number of patients in the outpatient setting was small in all countries, precluding meaningful interpretation of the respective sensitivity analysis.

*Infection prophylaxis, including anti-infective treatments*

In Bulgaria, the sensitivity analysis showed more anti-infectives in patients receiving 1-2 chemotherapy cycles (88%) compared to 3-4 ( 58%) or >4 chemotherapy cycles (63%), as well as more anti-infectives in patients who died (94%) compared to patients other than those who died (70%). In the Czech Republic the number of chemotherapy cycles received did not show substantial differences in anti-infective use (100%, 92%, 95%). The sensitivity analysis with respect to death could not be conducted for the Czech Republic due to the fact that only patients alive at the time of data collection were able to provide informed consent. In Slovakia, no substantial difference could be established for the number of chemotherapy cycle subgroups (100%, 100%, 96%) or with respect to patient death (92%, 100%).

Table S1. **Tumor type according to the international code of diseases (ICD)**

| **n (%)** | **Bulgaria N=156** | **Czech Republic N=79** | **Slovakia N=79** |
| --- | --- | --- | --- |
| *Solid tumor[a]* | *64 (41.0)* | *18 (22.8)* | *49 (62.0)* |
| C09 Malignant neoplasm of tonsil | 1 (1.6) | 0 (0.0) | 0 (0.0) |
| C13 Malignant neoplasm of hypopharynx | 1 (1.6) | 0 (0.0) | 1 (2.0) |
| C16 Malignant neoplasm of stomach | 1 (1.6) | 0 (0.0) | 6 (12.2) |
| C18 Malignant neoplasm of colon | 7 (10.9) | 1 (5.6) | 3 (6.1) |
| C20 Malignant neoplasm of rectum | 1 (1.6) | 0 (0.0) | 1 (2.0) |
| C21 Malignant neoplasm of anus and anal canal | 1 (1.6) | 0 (0.0) | 0 (0.0) |
| C23 Malignant neoplasm of gallbladder | 0 (0.0) | 0 (0.0) | 1 (2.0) |
| C25 Malignant neoplasm of pancreas | 2 (3.1) | 0 (0.0) | 0 (0.0) |
| C30 Malignant neoplasm of nasal cavity and middle ear | 0 (0.0) | 0 (0.0) | 1 (2.0) |
| C31 Malignant neoplasm of accessory sinuses | 1 (1.6) | 0 (0.0) | 1 (2.0) |
| C32 Malignant neoplasm of larynx | 1 (1.6) | 1 (5.6) | 1 (2.0) |
| C34 Malignant neoplasm of bronchus and lung NSCLC | 6 (9.4) | 1 (5.6) | 2 (4.1) |
| C34 Malignant neoplasm of bronchus and lung SCLC | 6 (9.4) | 0 (0.0) | 1 (2.0) |
| C40 Malignant neoplasm of bone and articular cartilage of limbs | 0 (0.0) | 1 (5.6) | 0 (0.0) |
| C41 Malignant neoplasm of bone and articular cartilage of other and unspecified sites | 0 (0.0) | 2 (11.1) | 0 (0.0) |
| C45 Mesothelioma | 1 (1.6) | 0 (0.0) | 0 (0.0) |
| C48 Malignant neoplasm of retroperitoneum and peritoneum | 1 (1.6) | 0 (0.0) | 2 (4.1) |
| C49 Malignant neoplasm of other connective and soft tissue | 1 (1.6) | 1 (5.6) | 1 (2.0) |
| C50 Malignant neoplasm of breast | 15 (23.4) | 1 (5.6) | 12 (24.5) |
| C53 Malignant neoplasm of cervix uteri | 0 (0.0) | 0 (0.0) | 5 (10.2) |
| C54 Malignant neoplasm of corpus uteri | 1 (1.6) | 1 (5.6) | 2 (4.1) |
| C56 Malignant neoplasm of ovary | 4 (6.3) | 3 (16.7) | 1 (2.0) |
| C57 Malignant neoplasm of other and unspecified female genital organs | 1 (1.6) | 0 (0.0) | 0 (0.0) |
| C61 Malignant neoplasm of prostate | 1 (1.6) | 1 (5.6) | 1 (2.0) |
| C62 Malignant neoplasm of testis | 3 (4.7) | 5 (27.8) | 5 (10.2) |
| C64 Malignant neoplasm of kidney, except renal pelvis | 1 (1.6) | 0 (0.0) | 0 (0.0) |
| C67 Malignant neoplasm of bladder | 3 (4.7) | 0 (0.0) | 0 (0.0) |
| C71 Malignant neoplasm of brain | 0 (0.0) | 0 (0.0) | 1 (2.0) |
| C72 Malignant neoplasm of spinal cord, cranial nerves and other parts of central nervous system | 1 (1.6) | 0 (0.0) | 0 (0.0) |
| C73 Malignant neoplasm of thyroid gland | 0 (0.0) | 0 (0.0) | 1 (2.0) |
| C80 Malignant neoplasm of without specification of site | 2 (3.1) | 0 (0.0) | 0 (0.0) |
| *Hematological malignancy[a]* | *92 (59.0)* | *61 (77.2)* | *30 (38.0)* |
| C81 Hodgkin's disease | 15 (16.3) | 11 (18.0) | 4 (13.3) |
| C82 Follicular [nodular] non-Hodgkin's lymphoma | 1 (1.1) | 5 (8.2) | 3 (10.0) |
| C83 Non-follicular lymphoma (non-Hodgkin B-cell lymphoma) | 22 (23.9) | 19 (31.1) | 10 (33.3) |
| C84 Mature T/NK-cell lymphomas | 4 (4.3) | 3 (4.9) | 3 (10.0) |
| C85 Other and unspecified types of non-Hodgkin's lymphoma | 11 (12.0) | 0 (0.0) | 3 (10.0) |
| C88 Malignant immunoproliferative disease | 0 (0.0) | 1 (1.6) | 0 (0.0) |
| C90 Multiple myeloma and malignant plasma cell neoplasms | 6 (6.5) | 15 (24.6) | 0 (0.0) |
| C91 Lymphoid leukaemia | 2 (2.2) | 4 (6.6) | 2 (6.7) |
| C92 Myeloid leukemia | 27 (29.3) | 3 (4.9) | 5 (16.7) |
| C93 Monocytic leukaemia | 1 (1.1) | 0 (0.0) | 0 (0.0) |
| C94 Other leukaemias of specified cell type | 3 (3.3) | 0 (0.0) | 0 (0.0) |

Table S2. Investigations associated with FN in the index cycle

|  | **Bulgaria** | | | **Czech Republic** | | | **Slovakia** | | |
| --- | --- | --- | --- | --- | --- | --- | --- | --- | --- |
|  | **ST N=64** | **HM N=92** | **Total N=156** | **ST N=18** | **HM N=61** | **Total N=79** | **ST N=49** | **HM N=30** | **Total N=79** |
| **No. of patients with ≥1 investigation, n (%)** | 53 (82.8) | 72 (78.3) | 125 (80.1) | 17 (94.4) | 32 (52.5) | 49 (62.0) | 38 (77.6) | 28 (93.3) | 66 (83.5) |
| **Total No. of investigations** | 207 | 324 | 531 | 113 | 383 | 496 | 319 | 266 | 585 |
| **Blood test** |  |  |  |  |  |  |  |  |  |
| No. of patients[a] (%) | 53 (82.8) | 63 (68.5) | 116 (74.4) | 16 (88.9) | 21 (34.4) | 37 (46.8) | 38 (77.6) | 26 (86.7) | 64 (81.0) |
| No. of investigations | 183 | 229 | 412 | 75 | 131 | 206 | 194 | 144 | 338 |
| **Imaging** |  |  |  |  |  |  |  |  |  |
| No. of patients[a] (%) | 9 (14.1) | 18 (19.6) | 27 (17.3) | 5 (27.8) | 26 (42.6) | 31 (39.2) | 11 (22.4) | 18 (60.0) | 29 (36.7) |
| No. of investigations | 12 | 22 | 34 | 5 | 48 | 53 | 21 | 30 | 51 |
| **Blood culture and sensitivity** |  |  |  |  |  |  |  |  |  |
| No. of patients[a] (%) | 2 (3.1) | 19 (20.7) | 21 (13.5) | 7 (38.9) | 32 (52.5) | 39 (49.4) | 18 (36.7) | 23 (76.7) | 41 (51.9) |
| No. of investigations | 2 | 29 | 31 | 8 | 55 | 63 | 26 | 33 | 59 |
| **Echocardiograms** |  |  |  |  |  |  |  |  |  |
| No. of patients[a] (%) | 8 (12.5) | 3 (3.3) | 11 (7.1) | 0 (0.0) | 1 (1.6) | 1 (1.3) | 0 (0.0) | 3 (10.0) | 3 (3.8) |
| No. of investigations | 8 | 3 | 11 | 0 | 1 | 1 | 0 | 9 | 9 |
| **Mid-stream urine and sensitivity** |  |  |  |  |  |  |  |  |  |
| No. of patients[a] (%) | 0 (0.0) | 5 (5.4) | 5 (3.2) | 8 (44.4%) | 23 (37.7) | 31 (39.2) | 19 (38.8) | 12 (40.0) | 31 (39.2) |
| No. of investigations | 0 | 5 | 5 | 10 | 42 | 52 | 20 | 14 | 34 |
| **Sputum culture and sensitivity (urine culture)** |  |  |  |  |  |  |  |  |  |
| No. of patients[a] (%) | 0 (0.0) | 6 (6.5) | 6 (3.8) | 1 (5.6) | 23 (37.7) | 24 (30.4) | 11 (22.4) | 3 (10.0) | 14 (17.7) |
| No. of investigations | 0 | 8 | 8 | 1 | 32 | 33 | 14 | 3 | 17 |
| **Stool culture** |  |  |  |  |  |  |  |  |  |
| No. of patients[a] (%) | 0 (0.0) | 0 (0.0) | 0 (0.0) | 2 (11.1) | 11 (18.0) | 13 (16.5) | 6 (12.2) | 1 (3.3) | 7 (8.9) |
| No. of investigations | 0 | 0 | 0 | 2 | 13 | 15 | 6 | 1 | 7 |
| **Clostridium difficile Toxin A/B** |  |  |  |  |  |  |  |  |  |
| No. of patients[a] (%) | 0 (0.0) | 0 (0.0) | 0 (0.0) | 0 (0.0) | 7 (11.5) | 7 (8.9) | 3 (6.1) | 0 (0.0) | 3 (3.8) |
| No. of investigations | 0 | 0 | 0 | 0 | 10 | 10 | 3 | 0 | 3 |
| **Swabs** |  |  |  |  |  |  |  |  |  |
| No. of patients[a] (%) | 0 (0.0) | 3 (3.3) | 3 (1.9) | 4 (22.2) | 0 (0.0) | 4 (5.1) | 14 (28.6) | 17 (56.7) | 31 (39.2) |
| No. of investigations | 0 | 3 | 3 | 5 | 0 | 5 | 16 | 22 | 38 |
| **Drug levels (e.g. Aminoglycoside, Vankomycin)** |  |  |  |  |  |  |  |  |  |
| No. of patients[a] (%) | 0 (0.0) | 0 (0.0) | 0 (0.0) | 0 (0.0) | 9 (14.8) | 9 (11.4) | 2 (4.1) | 3 (10.0) | 5 (6.3) |
| No. of investigations | 0 | 0 | 0 | 0 | 23 | 23 | 3 | 3 | 6 |
| **Arterial blood gases** |  |  |  |  |  |  |  |  |  |
| No. of patients[a] (%) | 0 (0.0) | 3 (3.3) | 3 (1.9) | 0 (0.0) | 0 (0.0) | 0 (0.0) | 2 (4.1) | 1 (3.3) | 3 (3.8) |
| No. of investigations | 0 | 3 | 3 | 0 | 0 | 0 | 7 | 2 | 9 |
| **Anaerobe cultivation** |  |  |  |  |  |  |  |  |  |
| No. of patients[a] (%) | 0 (0.0) | 3 (3.3) | 3 (1.9) | 3 (16.7) | 1 (1.6) | 4 (5.1) | 1 (2.0) | 1 (3.3) | 2 (2.5) |
| No. of investigations | 0 | 5 | 5 | 3 | 1 | 4 | 1 | 1 | 2 |
| **Serum protein electrophoresis** |  |  |  |  |  |  |  |  |  |
| No. of patients[a] (%) | 0 (0.0) | 1 (1.1) | 1 (0.6) | 0 (0.0) | 0 (0.0) | 0 (0.0) | 0 (0.0) | 1 (3.3) | 1 (1.3) |
| No. of investigations | 0 | 1 | 1 | 0 | 0 | 0 | 0 | 1 | 1 |
| **Central line culture and sensitivity** |  |  |  |  |  |  |  |  |  |
| No. of patients[a] (%) | 0 (0.0) | 1 (1.1) | 1 (0.6) | 1 (5.6) | 7 (11.5) | 8 (10.1) | 1 (2.0) | 1 (3.3) | 2 (2.5) |
| No. of investigations | 0 | 1 | 1 | 1 | 8 | 9 | 1 | 1 | 2 |
| **Other** |  |  |  |  |  |  |  |  |  |
| No. of patients[a] (%) | 2 (3.1) | 10 (10.9) | 12 (7.7) | 3 (16.7) | 8 (13.1) | 11 (13.9) | 7 (14.3) | 2 (6.7) | 9 (11.4) |
| No. of investigations | 2 | 15 | 17 | 3 | 19 | 22 | 7 | 2 | 9 |

Source: Table 4.01.02; Note: Percentages are based on the number of the investigations performed for patients in FAS.

[a] percentages are based on the number of patients in FAS.

N, number of subjects; n, number of non-missing values; No., number

Table S3. Investigations associated with FN in the post-index cycles

|  | **Bulgaria** | | | **Czech Republic** | | | **Slovakia** | | |
| --- | --- | --- | --- | --- | --- | --- | --- | --- | --- |
|  | **ST N=64** | **HM N=92** | **Total N=156** | **ST N=18** | **HM N=61** | **Total N=79** | **ST N=49** | **HM N=30** | **Total N=79** |
| **No. of patients with ≥1 investigation, n (%)** | 4 (6.3) | 32 (34.8) | 36 (23.1) | 1 (5.6) | 1 (1.6) | 2 (2.5) | 4 (8.2) | 8 (26.7) | 12 (15.2) |
| **Total No. of investigations** | 5 | 135 | 140 | 5 | 1 | 6 | 44 | 33 | 77 |
| **Blood test** |  |  |  |  |  |  |  |  |  |
| No. of patients[a] (%) | 4 (6.3) | 27 (29.3) | 31 (19.9) | 1 (5.6) | 0 (0.0) | 1 (1.3) | 3 (6.1) | 8 (26.7) | 11 (13.9) |
| No. of investigations | 5 | 105 | 110 | 5 | 0 | 5 | 19 | 20 | 39 |
| **Imaging** |  |  |  |  |  |  |  |  |  |
| No. of patients[a] (%) | 0 (0.0) | 11 (12.0) | 11 (7.1) | 0 (0.0) | 0 (0.0) | 0 (0.0) | 3 (6.1) | 5 (16.7) | 8 (10.1) |
| No. of investigations | 0 | 17 | 17 | 0 | 0 | 0 | 5 | 5 | 10 |
| **Blood culture and sensitivity** |  |  |  |  |  |  |  |  |  |
| No. of patients[a] (%) | 0 (0.0) | 3 (3.3) | 3 (1.9) | 0 (0.0) | 0 (0.0) | 0 (0.0) | 3 (6.1) | 3 (10.0) | 6 (7.6) |
| No. of investigations | 0 | 9 | 9 | 0 | 0 | 0 | 4 | 3 | 7 |
| **Echocardiograms** |  |  |  |  |  |  |  |  |  |
| No. of patients[a] (%) | 0 (0.0) | 1 (1.1) | 1 (0.6) | 0 (0.0) | 0 (0.0) | 0 (0.0) | 0 (0.0) | 0 (0.0) | 0 (0.0) |
| No. of investigations | 0 | 1 | 1 | 0 | 0 | 0 | 0 | 0 | 0 |
| **Mid-stream urine and sensitivity** |  |  |  |  |  |  |  |  |  |
| No. of patients[a] (%) | 0 (0.0) | 0 (0.0) | 0 (0.0) | 0 (0.0) | 0 (0.0) | 0 (0.0) | 3 (6.1) | 2 (6.7) | 5 (6.3) |
| No. of investigations | 0 | 0 | 0 | 0 | 0 | 0 | 4 | 2 | 6 |
| **Sputum culture and sensitivity (urine culture)** |  |  |  |  |  |  |  |  |  |
| No. of patients[a] (%) | 0 (0.0) | 0 (0.0) | 0 (0.0) | 0 (0.0) | 0 (0.0) | 0 (0.0) | 1 (2.0) | 0 (0.0) | 1 (1.3) |
| No. of investigations | 0 | 0 | 0 | 0 | 0 | 0 | 1 | 0 | 1 |
| **Stool culture** |  |  |  |  |  |  |  |  |  |
| No. of patients[a] (%) | 0 (0.0) | 0 (0.0) | 0 (0.0) | 0 (0.0) | 0 (0.0) | 0 (0.0) | 1 (2.0) | 1 (3.3) | 2 (2.5) |
| No. of investigations | 0 | 0 | 0 | 0 | 0 | 0 | 1 | 1 | 2 |
| **Clostridium difficile Toxin A/B** |  |  |  |  |  |  |  |  |  |
| No. of patients[a] (%) | 0 (0.0) | 0 (0.0) | 0 (0.0) | 0 (0.0) | 1 (1.6) | 1 (1.3) | 1 (2.0) | 0 (0.0) | 1 (1.3) |
| No. of investigations | 0 | 0 | 0 | 0 | 1 | 1 | 1 | 0 | 1 |
| **Swabs** |  |  |  |  |  |  |  |  |  |
| No. of patients[a] (%) | 0 (0.0) | 0 (0.0) | 0 (0.0) | 0 (0.0) | 0 (0.0) | 0 (0.0) | 4 (8.2) | 1 (3.3) | 5 (6.3) |
| No. of investigations | 0 | 0 | 0 | 0 | 0 | 0 | 5 | 1 | 6 |
| **Drug levels (e.g. Aminoglycoside, Vankomycin)** |  |  |  |  |  |  |  |  |  |
| No. of patients[a] (%) | 0 (0.0) | 0 (0.0) | 0 (0.0) | 0 (0.0) | 0 (0.0) | 0 (0.0) | 0 (0.0) | 1 (3.3) | 1 (1.3) |
| No. of investigations | 0 | 0 | 0 | 0 | 0 | 0 | 0 | 1 | 1 |
| **Arterial blood gases** |  |  |  |  |  |  |  |  |  |
| No. of patients[a] (%) | 0 (0.0) | 0 (0.0) | 0 (0.0) | 0 (0.0) | 0 (0.0) | 0 (0.0) | 1 (2.0) | 0 (0.0) | 1 (1.3) |
| No. of investigations | 0 | 0 | 0 | 0 | 0 | 0 | 2 | 0 | 2 |
| **Other** |  |  |  |  |  |  |  |  |  |
| No. of patients[a] (%) | 0 (0.0) | 2 (2.2) | 2 (1.3) | 0 (0.0) | 0 (0.0) | 0 (0.0) | 1 (2.0) | 0 (0.0) | 1 (1.3) |
| No. of investigations | 0 | 3 | 3 | 0 | 0 | 0 | 2 | 0 | 2 |

Source: Table 4.01.03

Note: percentages are based on the number of the investigations performed for patients in FAS. Investigations that have not been carried out in any country are not listed.

[a] percentages are based on the number of patients in FAS.

N, number of subjects; n, number of non-missing values; No., number

Table S4. Interventions associated with FN in index cycle

|  | **Bulgaria** | | | **Czech Republic** | | | **Slovakia** | | |
| --- | --- | --- | --- | --- | --- | --- | --- | --- | --- |
|  | **ST N=64** | **HM N=92** | **Total N=156** | **ST N=18** | **HM N=61** | **Total N=79** | **ST N=49** | **HM N=30** | **Total N=79** |
| **No. of patients with ≥1 intervention, n (%)** | 45 (70.3) | 64 (69.6) | 109 (69.9) | 16 (88.9) | 30 (49.2) | 46 (58.2) | 29 (59.2) | 26 (86.7) | 55 (69.6) |
| **Total No. of interventions** | 220 | 196 | 416 | 94 | 234 | 328 | 283 | 190 | 473 |
| **IV fluids** |  |  |  |  |  |  |  |  |  |
| No. of patients[a] (%) | 41 (64.1) | 52 (56.5) | 93 (59.6) | 15 (83.3) | 28 (45.9) | 43 (54.4) | 26 (53.1) | 21 (70.0) | 47 (59.5) |
| No. of interventions | 194 | 89 | 283 | 85 | 155 | 240 | 171 | 84 | 255 |
| **RBC transfusions** |  |  |  |  |  |  |  |  |  |
| No. of patients[a] (%) | 11 (17.2) | 25 (27.2) | 36 (23.1) | 2 (11.1) | 11 (18.0) | 13 (16.5) | 16 (32.7) | 16 (53.3) | 32 (40.5) |
| No. of interventions | 17 | 60 | 77 | 2 | 13 | 15 | 31 | 37 | 68 |
| **Insertion of central venous access line** |  |  |  |  |  |  |  |  |  |
| No. of patients[a] (%) | 0 (0.0) | 0 (0.0) | 0 (0.0) | 1 (5.6) | 5 (8.2) | 6 (7.6) | 1 (2.0) | 3 (10.0) | 4 (5.1) |
| No. of interventions | 0 | 0 | 0 | 1 | 5 | 6 | 1 | 3 | 4 |
| **Invasive interventions supporting vital functions[b]** |  |  |  |  |  |  |  |  |  |
| No. of patients[a] (%) | 0 (0.0) | 1 (1.1) | 1 (0.6) | 0 (0.0) | 0 (0.0) | 0 (0.0) | 1 (2.0) | 3 (10.0) | 4 (5.1) |
| No. of interventions | 0 | 1 | 1 | 0 | 0 | 0 | 3 | 7 | 10 |
| **Other** |  |  |  |  |  |  |  |  |  |
| No. of patients[a] (%) | 5 (7.8) | 15 (16.3) | 20 (12.8) | 4 (22.2) | 8 (13.1) | 12 (15.2) | 7 (14.3) | 7 (23.3) | 14 (17.7) |
| No. of interventions | 9 | 46 | 55 | 6 | 61 | 67 | 77 | 59 | 136 |

Source: Tables 4.02.02

Note: percentages are based on the number of the investigations performed for patients in FAS.

[a] percentages are based on the number of patients in FAS

[b] eg. dialysis, artificial ventilation

N, number of subjects; n, number of non-missing values; No., number

Table S5. Interventions associated with FN in post-index cycles

|  | **Bulgaria** | | | **Czech Republic** | | | **Slovakia** | | |
| --- | --- | --- | --- | --- | --- | --- | --- | --- | --- |
|  | **ST N=64** | **HM N=92** | **Total N=156** | **ST N=18** | **HM N=61** | **Total N=79** | **ST N=49** | **HM N=30** | **Total N=79** |
| **No. of patients with ≥1 intervention, n (%)** | 7 (10.9) | 23 (25.0) | 30 (19.2) | 1 (5.6) | 2 (3.3) | 3 (3.8) | 5 (10.2) | 6 (20.0) | 11 (13.9) |
| **Total No. of interventions** | 10 | 59 | 69 | 8 | 4 | 12 | 35 | 11 | 46 |
| **IV fluids** |  |  |  |  |  |  |  |  |  |
| No. of patients[a] (%) | 5 (7.8) | 22 (23.9) | 27 (17.3) | 1 (5.6) | 2 (3.3) | 3 (3.8) | 4 (8.2) | 4 (13.3) | 8 (10.1) |
| No. of interventions | 8 | 53 | 61 | 3 | 4 | 7 | 16 | 6 | 22 |
| **RBC transfusions** |  |  |  |  |  |  |  |  |  |
| No. of patients[a] (%) | 1 (1.6) | 3 (3.3) | 4 (2.6) | 0 (0.0) | 0 (0.0) | 0 (0.0) | 3 (6.1) | 3 (10.0) | 6 (7.6) |
| No. of interventions | 1 | 5 | 6 | 0 | 0 | 0 | 9 | 3 | 12 |
| **Insertion of central venous access line** |  |  |  |  |  |  |  |  |  |
| No. of patients[a] (%) | 0 (0.0) | 0 (0.0) | 0 (0.0) | 0 (0.0) | 0 (0.0) | 0 (0.0) | 0 (0.0) | 1 (3.3) | 1 (1.3) |
| No. of interventions | 0 | 0 | 0 | 0 | 0 | 0 | 0 | 1 | 1 |
| **Invasive interventions supporting vital functions[b]** |  |  |  |  |  |  |  |  |  |
| No. of patients[a] (%) | 0 (0.0) | 0 (0.0) | 0 (0.0) | 0 (0.0) | 0 (0.0) | 0 (0.0) | 1 (2.0) | 0 (0.0) | 1 (1.3) |
| No. of interventions | 0 | 0 | 0 | 0 | 0 | 0 | 2 | 0 | 2 |
| **Other** |  |  |  |  |  |  |  |  |  |
| No. of patients[a] (%) | 1 (1.6) | 1 (1.1) | 2 (1.3) | 1 (5.6) | 0 (0.0) | 1 (1.3) | 1 (2.0) | 1 (3.3) | 2 (2.5) |
| No. of interventions | 1 | 1 | 2 | 5 | 0 | 5 | 8 | 1 | 9 |

Note: percentages are based on the number of the investigations performed for patients in FAS.

[a] percentages are based on the number of patients in FAS

N, number of subjects; n, number of non-missing values; No., number

**Sensitivity analyses**

In the Czech Republic, inclusion of patients was only possible if they could provide informed consent, requiring the patient to be alive at the time of study start. This may have led to inclusion of lower-risk patients in the Czech Republic and underestimation of HCRU in this country. We performed a sensitivity analysis of patients who died and patients other than those who died. For some investigations or interventions a difference was observed between patients who died and other patients, but there was no uniform trend towards higher or lower HCRU in one group over the other.

Patients were also categorized by the number of chemotherapy cycles received during the study (1-2 cycles, 3-4 cycles, >4 cycles) and HCRU was summarized within these categories. The results of this analysis were assessed along with those for the primary analysis of HCRU and it was found that variable length of follow-up did have an impact on the results, but again with no uniform trend.

**Table S6. Sensitivity analysis, most frequent investigations and interventions**

|  | **Overall** | **1-2 cycles** | **3-4 cycles** | **>4 cycles** | **Died** | **Other than those who died** |
| --- | --- | --- | --- | --- | --- | --- |
|  | **Bulgaria** | | | | | |
|  | **N=156** | **N=67** | **N=40** | **N=49** | **N=17** | **n=139** |
| Investigations |  |  |  |  |  |  |
| Blood tests | 78.2% | 67.2% | 85.0% | 87.8% | 76.5% | 78.4% |
| Imaging | 30.1% | 22.4% | 12.5% | 6.1% | 41.2% | 11.5% |
| Blood culture and sensitivity tests | 14.7% | 19.4% | 35.0% | 40.8% | 35.3% | 29.5% |
| Interventions |  |  |  |  |  |  |
| IV fluids | 60.9% | 55.2% | 57.7% | 71.4% | 52.9% | 61.9% |
| Red blood cell transfusions | 25.0% | 37.3% | 12.5% | 18.4% | 41.2% | 23.0% |
|  | **Czech Republic** | | | | | |
|  | **N=79** | **N=47** | **N=13** | **N=19** | **N=0** | **N=79** |
| Investigations |  |  |  |  |  |  |
| Blood tests | 48.1% | 23.4% | 76.9% | 89.5% | - | 48.1% |
| Imaging | 49.4% | 34.0% | 46.2% | 89.5% | - | 49.4% |
| Blood culture and sensitivity tests | 40.5% | 23.4% | 69.2% | 63.2% | - | 40.5% |
| Interventions |  |  |  |  |  |  |
| IV fluids | 55.7% | 34.0% | 76.9% | 94.7% | - | 55.7% |
| Red blood cell transfusions | 16.5% | 2.1% | 30.8% | 42.1% | - | 16.5% |
|  | **Slovakia** | | | | | |
|  | **N=79** | **N=31** | **N=20** | **N=28** | **N=13** | **N=66** |
| Investigations |  |  |  |  |  |  |
| Blood tests | 87.3% | 83.9% | 80.0% | 96.4% | 84.6% | 87.9% |
| Imaging | 58.2% | 61.3% | 60.0% | 53.6% | 53.8% | 59.1% |
| Blood culture and sensitivity tests | 44.3% | 29.0% | 50.0% | 57.1% | 38.5% | 45.5% |
| Interventions |  |  |  |  |  |  |
| IV fluids | 65.8% | 51.6% | 55.0% | 89.3% | 61.5% | 66.7% |
| Red blood cell transfusions | 45.6% | 45.2% | 50.0% | 42.9% | 53.8% | 43.9% |

[a] In the Czech Republic only those patients were allowed to participate in the study who were alive and thus able to provide informed consent
